# Supplementary material for: Therapeutic effects of oral administration of lytic Salmonella phages in a mouse model of non-typhoidal salmonellosis
Source: PubMed Central journal article supplement (PMC9589268; doi:10.3389/fmicb.2022.955136), 2022-10-10
Supplement: Table_1.pdf [file Table_1.pdf]

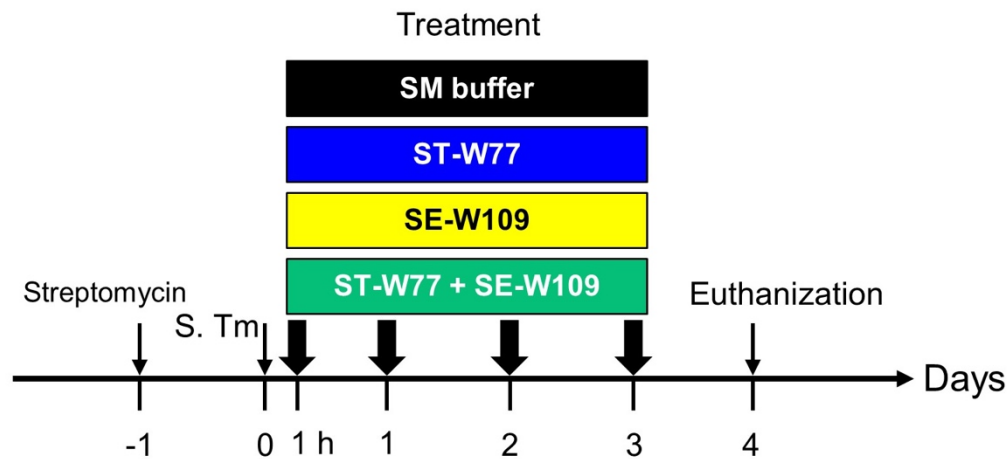

**Figure S1: The schematic of phage treatment in *S. Typhimurium*-infected mouse model established in this study.** After one-week acclimatization, 6-8 week-old female C57BL/6NJcl mice were orally fed with 100  $\mu$ L of 200 mg/mL streptomycin sulfate one day before *S. Typhimurium* oral infection with 100  $\mu$ L of  $10^9$  CFU/mL ( $10^8$  CFU/mouse). Infected mice were divided into 4 groups (7 mice per group) and orally fed 100  $\mu$ L of  $10^{11}$  PFU/mL ( $10^{10}$  PFU/mouse) of ST-W77, SE-W109, ST-W77 combined with SE-W109, and SM buffer as the indicated time point. All mice were euthanized on day 4 post-infection.

**Table S1. The list of bacterial and phage strains used in this study**

| <b>Designation</b>           | <b>Genotype and relevant characteristic</b>          | <b>Reference</b> |
|------------------------------|------------------------------------------------------|------------------|
| S. Typhimurium IR715 (S. Tm) | Nalidixic acid-resistant derivative of ATCC<br>14028 | (1)              |
| ST-W77                       | Myovirus within the Viunalikevirus                   | (2)              |
| SE-W109                      | Siphovirus within the Jerseylikevirus                | (2)              |

**Table S2. The list of primers used in this study**

| <b>Organism</b>     | <b>Target gene</b> | <b>Primers</b>                                                    | <b>Reference</b> |
|---------------------|--------------------|-------------------------------------------------------------------|------------------|
| <i>Homo sapiens</i> | <i>GAPDH</i>       | 5'-CCAGGAAATGAGCTTGACAAAGT-3'<br>5'-CCCACTCCTCCACCTTTGAC-3'       | (3)              |
|                     | <i>IL-8</i>        | 5'-GCCAACACAGAAATTATTGTAAAGCTT-3'<br>5'-CCTCTGCACCCAGTTTTTCCTT-3' | (4)              |
|                     | <i>MIP-3A</i>      | 5'-CTGCTTTGATGTCAGTGCTGCTAC-3'<br>5'-CTGCCGTGTGAAGCCCACAATAAA-3'  | (5)              |
|                     | <i>IL-1B</i>       | 5'-AAACAGATGAAGTGCTCCTTCCAGG-3'<br>5'-TGGAGAACACCACTTGTTGCTCCA-3' | (6)              |
| <i>Mus musculus</i> | <i>Gapdh</i>       | 5'-TGTAGACCATGTAGTTGAGGTCA-3'<br>5'-AGGTCGGTGTGAACGGATTTG-3'      | (7)              |
|                     | <i>Kc</i>          | 5'-TGCACCCAAACCGAAGTCAT-3'<br>5'-TTGTCAGAAGCCAGCGTTCAC-3'         |                  |
|                     | <i>Nos2</i>        | 5'-CCAGCCTTGCATCCTCATTGG-3'<br>5'-CCAAACACCAAGCTCATGCGG-3'        |                  |
|                     | <i>IL-17</i>       | 5'- GCTCCAGAAGGCCCTCAGA-3'<br>5'- AGCTTTCCTCCGCATTGA-3'           | (8)              |
|                     | <i>IFN-g</i>       | 5'- TCAAGTGGCATAGATGTGGAAGAA-3'<br>5'- TGGCTCTGCAGGATTTTCATG-3'   | (8)              |
|                     | <i>Zo-1</i>        | 5'-CAGGGCTCTTTGGAGGAA-3'<br>5'-TACACGATCGTGGCAATAAAC-3'           | (9)              |

**Table S3. The criteria for mouse cecal histopathological scoring used in this study (10)**

| <b>Score</b> | <b>Neutrophils infiltration</b> | <b>Mononuclear leukocyte infiltration</b> | <b>Submucosal edema</b> | <b>Epithelial damage</b>                                                              | <b>Exudate</b>        |
|--------------|---------------------------------|-------------------------------------------|-------------------------|---------------------------------------------------------------------------------------|-----------------------|
| 0            | No changes<br>(0-5)             | No changes<br>(0-5)                       | No changes              | No changes                                                                            | No changes            |
| 1            | 6-20                            | 6-10                                      | Detectable<br>(<10%)    | Desquamation                                                                          | Slight accumulation   |
| 2            | 21-60                           | 11-20                                     | Mild<br>(10-20%)        | Mild erosion and mild loss of goblet cells / undifferentiated enterocytes hyperplasia | Mild accumulation     |
| 3            | 61-100                          | 21-40                                     | Moderate<br>(21-40%)    | Marked erosion and moderate loss of goblet cells / undifferentiated hyperplasia       | Moderate accumulation |
| 4            | >100                            | >40                                       | Marked<br>(>40%)        | Ulceration and marked loss of goblet cells / undifferentiated hyperplasia             | Marked accumulation   |

## References:

1. Stojiljkovic I, Baumler AJ, Heffron F. Ethanolamine utilization in *Salmonella typhimurium*: nucleotide sequence, protein expression, and mutational analysis of the *cchA cchB eutE eutJ eutG eutH* gene cluster. *J Bacteriol.* 1995;177(5):1357-66.
2. Phothaworn P, Supokaivanich R, Lim J, Klumpp J, Imam M, Kutter E, et al. Development of a broad-spectrum *Salmonella* phage cocktail containing Viunalike and Jerseylike viruses isolated from Thailand. *Food Microbiol.* 2020;92:103586.
3. Raffatellu M, Chessa D, Wilson RP, Dusold R, Rubino S, Baumler AJ. The Vi capsular antigen of *Salmonella enterica* serotype Typhi reduces Toll-like receptor-dependent interleukin-8 expression in the intestinal mucosa. *Infection and immunity.* 2005;73(6):3367-74.
4. Stylianou E, Yndestad A, Sikkeland LI, Bjerkeli V, Damas JK, Haug T, et al. Effects of interferon-alpha on gene expression of chemokines and members of the tumour necrosis factor superfamily in HIV-infected patients. *Clin Exp Immunol.* 2002;130(2):279-85.
5. Johanesen PA, Dwinell MB. Flagellin-independent regulation of chemokine host defense in *Campylobacter jejuni*-infected intestinal epithelium. *Infection and immunity.* 2006;74(6):3437-47.
6. Jung HC, Eckmann L, Yang SK, Panja A, Fierer J, Morzycka-Wroblewska E, et al. A distinct array of proinflammatory cytokines is expressed in human colon epithelial cells in response to bacterial invasion. *J Clin Invest.* 1995;95(1):55-65.
7. Winter SE, Thiennimitr P, Winter MG, Butler BP, Huseby DL, Crawford RW, et al. Gut inflammation provides a respiratory electron acceptor for *Salmonella*. *Nature.* 2010;467(7314):426-9.
8. Winter SE, Thiennimitr P, Nuccio SP, Haneda T, Winter MG, Wilson RP, et al. Contribution of flagellin pattern recognition to intestinal inflammation during *Salmonella enterica* serotype typhimurium infection. *Infection and immunity.* 2009;77(5):1904-16.
9. Inagaki-Ohara K, Sawaguchi A, Sugauma T, Matsuzaki G, Nawa Y. Intraepithelial lymphocytes express junctional molecules in murine small intestine. *Biochemical and biophysical research communications.* 2005;331(4):977-83.
10. Buddhasiri S, Sukjoi C, Kaewsakhorn T, Nambunmee K, Nakphaichit M, Nitisinprasert S, et al. Anti-inflammatory Effect of Probiotic *Limosilactobacillus reuteri* KUB-AC5 Against *Salmonella* Infection in a Mouse Colitis Model. *Front Microbiol.* 2021;12:716761.
